# Supplementary material
Source: ML conference proceedings conference paper supplement (https://proceedings.mlr.press/v84/lang18a.html)
Supplement: Supplementary file [file lang18a-supp.pdf]

## A Supplementary Material

### A.1 Relaxation on Local Polytope

The relaxation of (1) over the *local polytope* is given by:

$$\begin{aligned}
 \min_{\mu} \quad & \sum_{u \in V} \sum_{i \in L} \mu_u(i) c(u, i) + \sum_{e=(u,v)} \sum_{i,j} \mu_e(ij) \theta_{(u,v)}(i, j) \\
 \text{s.t.} \quad & \sum_i \mu_u(i) = 1, \quad \forall u \in V. \\
 & \sum_j \mu_e(ij) = \mu_u(i), \quad \forall e = (u, v) \in E, i \in L. \\
 & \sum_i \mu_e(ij) = \mu_v(j), \quad \forall e = (u, v) \in E, j \in L. \\
 & \mu_u(i) \geq 0, \quad \forall u \in V, i \in L. \\
 & \mu_e(ij) \geq 0, \quad \forall e \in E, i, j \in L.
 \end{aligned}$$

For a Ferromagnetic Potts Model, the objective becomes:

$$\min_{\mu} \sum_{u \in V} \sum_{i \in L} \mu_u(i) c(u, i) + \sum_{e=(u,v)} w(u, v) \sum_{i,j} \mu_e(ij) \mathbb{1}(i \neq j)$$

Fix the values  $\mu_u(i)$ . We want to minimize

$$\sum_{e=(u,v)} w(u, v) \sum_{i,j} \mu_e(ij) \mathbb{1}(i \neq j)$$

subject to the constraints

$$\begin{aligned}
 \sum_j \mu_e(ij) &= \mu_u(i), \quad \forall e = (u, v) \in E, i \in L. \\
 \sum_i \mu_e(ij) &= \mu_v(j), \quad \forall e = (u, v) \in E, j \in L. \\
 \mu_e(ij) &\geq 0, \quad \forall e \in E, i, j \in L.
 \end{aligned}$$

Because  $w(u, v) \geq 0$  and  $\mu_e(ij) \geq 0$ , we want to put as much mass on  $\mu_e(ii)$  as possible without violating a constraint, since those terms do not appear in the objective. To that end, we set  $\mu_e(ii) = \min(\mu_u(i), \mu_v(i))$ . Then using the first constraint, the objective becomes:

$$\begin{aligned}
 & \sum_{e=(u,v)} w(u, v) \sum_i \mu_u(i) - \min(\mu_u(i), \mu_v(i)) \\
 &= \sum_{e=(u,v)} w(u, v) \left( 1 - \frac{1}{2} \sum_i \mu_u(i) + \mu_v(i) \right. \\
 & \quad \left. + \sum_i |\mu_u(i) - \mu_v(i)| \right) \\
 &= \sum_{e=(u,v)} w(u, v) \sum_i |\mu_u(i) - \mu_v(i)| \\
 &= \sum_{e=(u,v)} w(u, v) \frac{|\mu_u - \mu_v|}{2},
 \end{aligned}$$

where we use multiple times that  $\sum_i \mu_u(i) = 1$ . The LP objective is thus:

$$\min_{\mu} \sum_{u \in V} \sum_{i \in L} \mu_u(i) c(u, i) + \sum_{e=(u,v)} w(u, v) \frac{|\mu_u - \mu_v|}{2}$$

Identifying  $\mu_u$  with  $\bar{u}$  and  $\mu_v$  with  $\bar{v}$ , we obtain the LP (3).

### A.2 Proof of Lemma 1

*Proof.* This argument is similar to the one in Angelidakis et al. (2017). First, we verify the last two conditions in Lemma 1. Let  $\alpha = \frac{2}{k\theta} = \frac{5}{3}$  and  $\beta = k\theta = \frac{6}{5}$ . The algorithm clearly returns a feasible solution (i.e. a valid labeling). Consider any two vertices  $u$  and  $v$ , and let  $\Delta = d(u, v)$ . There are two cases:  $j(u) = j(v)$  and  $j(u) \neq j(v)$ . In the first case, let  $j = j(u) = j(v)$ . We have  $P(u) \neq P(v)$  exactly when  $r \in (\min(\bar{u}_i, \bar{v}_i), \max(\bar{u}_i, \bar{v}_i)]$  and  $i \neq j$ .  $r$  is uniformly distributed in  $(0, \theta)$ , so the probability of this occurring is

$$\mathbb{P}[P(u) \neq P(v)] = \frac{1}{k} \sum_{i:i \neq j} \frac{|\bar{u}_i - \bar{v}_i|}{\theta} \leq \frac{2}{k\theta} d(u, v) = \alpha \Delta.$$

Note that we used  $u_i \leq \varepsilon < \theta$  for  $i \neq j$  and for all  $u$ . Now consider the case where  $j(u) \neq j(v)$ . Here  $d(u, v) \geq d(e_{j(u)}, e_{j(v)}) - d(u, e_{j(u)}) - d(v, e_{j(v)})$  by the triangle inequality ( $e_i$  is the  $i$ th standard basis vector in  $\mathbb{R}^k$ ). So  $d(u, v) \geq 1 - 2\varepsilon \geq 1 - 2/30$  for  $k \geq 3$ . So  $d(u, v) \geq 14/15$ , and  $\alpha = 5/3$  so  $\alpha \Delta > 1$  and the bound trivially applies.

Next we verify the ‘‘co-approximation’’ condition. First consider the case where  $j(u) = j(v) = j$ . Then  $d(u, v) \leq d(u, e_j) + d(e_j, v) \leq 2\varepsilon \leq 1/15$ . As we showed,  $\mathbb{P}[P(u) \neq P(v)] \leq \alpha \Delta$ . So  $\mathbb{P}[P(u) = P(v)] \geq 1 - \alpha \Delta \geq \beta^{-1}(1 - \Delta)$ , where the last inequality is because  $\frac{1 - \beta^{-1}}{\alpha - \beta^{-1}} = \frac{1/6}{5/3 - 5/6} = \frac{1}{5} \geq \Delta$ . Now assume  $j(u) \neq j(v)$ . Note that if  $\bar{u}_i \geq r$  and  $\bar{v}_i \geq r$ ,  $u$  and  $v$  are both added to  $P_i$ . So

$$\begin{aligned}
 \mathbb{P}[P(u) = P(v)] &\geq \mathbb{P}[u_i \geq r, v_i \geq r] \\
 &= \frac{1}{k} \sum_{i=1}^k \frac{\min(\bar{u}_i, \bar{v}_i)}{\theta}.
 \end{aligned}$$

Here we used that for all  $i$ ,  $\min(\bar{u}_i, \bar{v}_i) \leq \varepsilon < \theta$  since  $j(u) \neq j(v)$ . Then

$$\begin{aligned}
 \mathbb{P}[P(u) = P(v)] &\geq \frac{1}{k} \sum_{i=1}^k \frac{\bar{u}_i + \bar{v}_i - |\bar{u}_i - \bar{v}_i|}{2\theta} \\
 &= \frac{1}{k\theta} (1 - d(u, v)) = \beta^{-1} (1 - d(u, v)).
 \end{aligned}$$

The approximation conditions hold.

Finally, we check the first two conditions of Lemma 1. First consider  $\mathbb{P}[P(u) = i, i \neq j(u)]$ . This can only occur when  $i$  is selected and  $u$  is assigned to  $P_i$ . So

$$\mathbb{P}[P(u) = i, i \neq j(u)] = \frac{1}{k} \mathbb{P}[\bar{u}_i \geq r] = \frac{1}{k} \frac{\bar{u}_i}{\theta} = \frac{5}{6} \bar{u}_i.$$

Now we compute  $\mathbb{P}[P(u) \neq j(u)]$ . A vertex  $u$  clearly can only be assigned a label  $i \neq j(u)$  if such an  $i$  is selected and  $u$  is assigned to it; namely,

$$\begin{aligned} \mathbb{P}[P(u) \neq j(u)] &= \frac{1}{k} \sum_{i: i \neq j(u)} \frac{\bar{u}_i}{\theta} = \frac{1}{k\theta} (1 - \bar{u}_{j(u)}) \\ &= \frac{5}{6} (1 - \bar{u}_{j(u)}). \end{aligned}$$

This concludes the proof.  $\square$

### A.3 Full Proof of Theorem 1

Here we reproduce the proof of Theorem 1 in more detail.

**Theorem.** *On a (2,1)-stable instance of UNIFORM METRIC LABELING with optimal integer solution  $g$ , the LP relaxation (3) is tight.*

*Proof.* Assume for a contradiction that the optimal LP solution  $\{\bar{u}^{LP}\}$  of (3) is fractional. To construct a stability-violating labeling, we will run Algorithm 2 on a fractional labeling  $\{\bar{u}\}$  constructed from  $\{\bar{u}^{LP}\}$  and the optimal integer solution  $g$ . We then use Lemma 1 to show that in expectation, the output of  $\mathcal{R}(\{\bar{u}\})$  must be better than the optimal integer solution in a particular (2,1)-perturbation, which contradicts (2,1)-stability.

Let  $\{\bar{u}^g\}$  be the solution to (3) corresponding to  $g$ , and define the following  $\varepsilon$ -close solution  $\{\bar{u}\}$ : for every  $u$  and every  $i$ , set  $\bar{u}_i = (1 - \varepsilon)\bar{u}_i^g + \varepsilon\bar{u}_i^{LP}$ . Note that  $\{\bar{u}\}$  is fractional and  $j(u) = g(u)$  for all  $u$ .

Recall that  $E_g$  is the set of edges cut by the optimal solution  $g$ . Define the following (2,1)-perturbation  $w'$  of the weights  $w$ :

$$w'(u, v) = \begin{cases} w(u, v) & (u, v) \in E_g \\ \frac{1}{2}w(u, v) & (u, v) \in E \setminus E_g. \end{cases}$$

We refer to the objective with modified weights  $w'$  as  $Q'$  (that is,  $Q'$  is the objective in the instance with weights  $w'$  and costs  $c$ ).

Now let  $h = \mathcal{R}(\{\bar{u}\})$ . To compare  $g$  and  $h$ , we will compute  $\mathbb{E}[Q'(g) - Q'(h)]$ , where the expectation is over the randomness of the rounding algorithm. By definition,

$$\begin{aligned} \mathbb{E}[Q'(g) - Q'(h)] &= \mathbb{E}[Q'(g) - Q'(h) | h = g] \Pr(h = g) \\ &\quad + \mathbb{E}[Q'(g) - Q'(h) | h \neq g] \Pr(h \neq g). \end{aligned}$$

The first term of the sum above is clearly zero. Further, as  $\{\bar{u}\}$  is fractional, the guarantees in Lemma 1 imply that  $\Pr(h \neq g) > 0$ . By (2,1)-stability of the instance, any labeling  $h \neq g$  must satisfy  $Q'(h) > Q'(g)$ . So stability and fractionality of the LP imply  $\mathbb{E}[Q'(g) - Q'(h)] < 0$ .

If we compute  $\mathbb{E}[Q'(g) - Q'(h)]$  and simplify using Lemma 1 and the definition of  $w'$  (see the appendix for a full derivation), we obtain:

$$\begin{aligned} Q'(g) - Q'(h) &= \sum_{u \in V_\Delta} c(u, g(u)) + \sum_{(u, v) \in E_g \setminus E_h} w'(u, v) \\ &\quad - \sum_{u \in V_\Delta} c(u, h(u)) - \sum_{(u, v) \in E_h \setminus E_g} w'(u, v). \end{aligned}$$

Taking the expectation, we obtain:

$$\begin{aligned} \mathbb{E}[Q'(g) - Q'(h)] &= \sum_{u \in V} c(u, g(u)) \Pr(h(u) \neq g(u)) \\ &\quad + \sum_{(u, v) \in E_g} w'(u, v) \Pr((u, v) \text{ not cut}) \\ &\quad - \sum_{u \in V} \sum_{i \neq g(u)} c(u, i) \Pr(h(u) = i) \\ &\quad - \sum_{(u, v) \in E \setminus E_g} w'(u, v) \Pr((u, v) \text{ cut}). \end{aligned}$$

Applying Lemma 1 with  $j(u) = g(u)$ ,

$$\begin{aligned} \mathbb{E}[Q'(g) - Q'(h)] &\geq \frac{5}{6} \left( \sum_{u \in V} c(u, g(u)) (1 - \bar{u}_{g(u)}) \right. \\ &\quad + \sum_{(u, v) \in E_g} w'(u, v) (1 - d(u, v)) \\ &\quad - \sum_{u \in V} \sum_{i \neq g(u)} c(u, i) \bar{u}_i \\ &\quad \left. - \sum_{(u, v) \in E \setminus E_g} 2w'(u, v) d(u, v) \right) \end{aligned}$$

Using the definition of  $w'$ ,

$$\begin{aligned} \mathbb{E}[Q'(g) - Q'(h)] &\geq \frac{5}{6} \left( \sum_{u \in V} c(u, g(u)) + \sum_{(u, v) \in E_g} w(u, v) \right. \\ &\quad \left. - \sum_{u \in V} \sum_{i \in L} c(u, i) \bar{u}_i - \sum_{(u, v) \in E} w(u, v) d(u, v) \right) \end{aligned}$$

The first two terms are simply  $Q(g)$ , and the last two are the objective  $Q(\{\bar{u}\})$  of the LP solution  $\bar{u}$ . Since  $\bar{u} = (1 - \varepsilon)\bar{u}^g + \varepsilon\bar{u}^{LP}$  and  $Q(\{\bar{u}^{LP}\}) \leq Q(\{\bar{u}^g\})$ , the convexity of the LP objective implies  $Q(\{\bar{u}\}) \leq Q(\{\bar{u}^g\}) = Q(g)$ . So  $\mathbb{E}[Q'(g) - Q'(h)] \geq 0$ . But stability of the instance and fractionality of the LP solution implied  $\mathbb{E}[Q'(g) - Q'(h)] < 0$ .  $\square$

#### A.4 Generating Counterexamples

The following procedure can be used to find  $(\beta, \gamma)$ -stable instances.

1. Given a fixed number of nodes  $n$  and labels  $k$ , randomly generate a graph  $G$  as follows:
  - (a) Connect any two nodes  $(u, v)$  with an edge with probability `connectProb`.
  - (b) When connecting two nodes, choose the edge weight  $w(u, v)$  uniformly at random from  $\mathbb{Z} \cap [0, \text{weightMax}]$ .
2. For each node  $u$ , choose an index  $i$  uniformly at random from  $\{1 \dots k\}$ . Draw  $c(u, i)$  uniformly at random from  $\mathbb{Z} \cap [0, \text{costMax}]$ . Set  $c(u, j) = 0$  for  $j \neq i$ .
3. Find the optimal solution  $g$  to the instance  $(G, w, c, L)$ .
4. Let  $E_g$  be the set of edges cut by  $g$ , and consider the following adversarial perturbation  $w'$  of  $w$ :

$$w'(u, v) = \begin{cases} \frac{1}{\beta}w(u, v) & (u, v) \in E \setminus E_g \\ \gamma w(u, v) & (u, v) \in E_g \end{cases}$$

Let  $Q'$  be the objective with these modified weights.

5. Enumerate the  $k^n - 1$  possible labelings not equal to  $g$ . If any of them have  $Q'(h) \leq Q'(g)$ , return to step 1. Otherwise, print  $V, E, w, c$ .

Following this procedure, we can also enforce additional properties of the instance in step 5 before printing it out. For instance, we can enforce that the LP must be fractional on the instance, or that  $\alpha$ -expansion must not find the optimal solution. If these additional conditions fail to hold, we return to step 1.

The examples in Section 6 were found with `connectProb` = 0.5, `weightMax` = 4, `costMax` = 20, and then modified for simplicity. Steps 3-5 were repeated for each modification to ensure the resulting instances satisfied the correct stability conditions. In Section 6,  $\beta = 1$  and  $\gamma = 2$ ; in Section 6,  $\beta = 2$  and  $\gamma = 1$ .

The following lemma proves that steps 3-5 are sufficient to verify stability.

**Lemma A.1.** *Let  $w^*$  be an arbitrary  $(\beta, \gamma)$ -perturbation of the weights  $w$ , and let  $w'$  be the adversarial perturbation for the optimal solution  $g$ . Then for any labeling  $h$ ,  $Q^*(h) \leq Q^*(g)$  implies  $Q'(h) \leq Q'(g)$ . In other words, if a labeling  $h$  violates stability in any perturbation, it violates stability in the adversarial perturbation  $w'$ .*

*Proof.* We show that  $Q^*(g) - Q^*(h) \leq Q'(g) - Q'(h)$ . Let  $V_\Delta = \{u \in V \mid g(u) \neq h(u)\}$ . Recall that  $E_g$  and  $E_h$  are the sets of edges cut by  $g$  and  $h$ , respectively. We compute

$$\begin{aligned} Q'(g) - Q'(h) &= \sum_{u \in V_\Delta} c(u, g(u)) + \sum_{(u,v) \in E_g \setminus E_h} w'(u, v) \\ &\quad - \sum_{u \in V_\Delta} c(u, h(u)) - \sum_{(u,v) \in E_h \setminus E_g} w'(u, v). \end{aligned}$$

Using the definition of  $w'$ ,

$$\begin{aligned} Q'(g) - Q'(h) &= \sum_{u \in V_\Delta} c(u, g(u)) + \sum_{(u,v) \in E_g \setminus E_h} \gamma w(u, v) \\ &\quad - \sum_{u \in V_\Delta} c(u, h(u)) - \sum_{(u,v) \in E_h \setminus E_g} \frac{w(u, v)}{\beta}. \end{aligned}$$

Since  $w^*$  is a valid  $(\beta, \gamma)$ -perturbation,  $\frac{1}{\beta}w(u, v) \leq w^*(u, v) \leq \gamma w(u, v)$ . Then since all the  $c$ 's and  $w$ 's are nonnegative,

$$\begin{aligned} Q'(g) - Q'(h) &\geq \sum_{u \in V_\Delta} c(u, g(u)) + \sum_{(u,v) \in E_g \setminus E_h} w^*(u, v) \\ &\quad - \sum_{u \in V_\Delta} c(u, h(u)) - \sum_{(u,v) \in E_h \setminus E_g} w^*(u, v) \\ &= Q^*(g) - Q^*(h). \end{aligned}$$

□
